# Supplementary material for: Educating the Next Generation in Sport and Exercise Medicine: A Cross-Sectional Survey
Source: Research Square preprint supplement (doi:10.21203/rs.3.rs-192073/v1), 2021-03-09
Supplement: Supplementary file 1 [file 2deee75433558af92b4e5329.docx]

**Educating the Next Generation in Sport and Exercise Medicine: A Cross-Sectional Survey**

Authors: Dr Katherine Rose Marino, Dr Daniel Fitzpatrick, Dr Dane Vishnubala

**Appendix 1: Questionnaire**

By indicating your consent below, you are agreeing to be part of our research study into undergraduate SEM teaching.

- I understand, I consent to participation and wish to begin the survey.
- I would not like to be part of this study.

**Section 1: Demographic Information**

1) Are you based in the UK?

- Yes
- No

2) What is your job role?

- Consultant
- Registrar
- GP with special interest in MSK/SEM
- GP without special interest in MSK/SEM
- What is your job role?
- Foundation Trainee (FY1/FY2)
- Clinical Medical student
- Pre-clinical medical student
- Other (then asked to specify)

3) What is your specialty?

- SEM
- Trauma & orthopaedics
- Rheumatology
- Emergency Medicine
- GP
- Other medical specialty
- Others surgical specialty
- Pre-specialisation
- Other (then asked to specify)

4) What proportion of your week do you spend working in SEM? (to nearest 20%) (asked only to seniors)

- 100%
- 80%
- 60%
- 40%
- 20%
- 0%

5) What qualifications in SEM do you hold? (could select more than 1)

- FFSEM
- MFSEM
- Msc (in sem)
- PGDip (in SEM)
- Bsc (in SEM)
- None
- Other (then asked to specify)

6) Are you considering pursuing a career in SEM? (asked only to juniors)

- Yes
- No

**Section 2: Opinions on Current Undergraduate SEM Provision**

Participants were asked to state their degree of agreement with the following statements. 1 meant disagree, 10 meant agree.

- Medical students currently receive enough teaching on SEM
- New graduates have adequate knowledge of SEM
- All medical students would benefit from increased teaching or resources on SEM

In addition, seniors alone were also asked to state their degree of agreement with the following statement.

- Medical students interested in pursuing a career in SEM would benefit from increased teaching or resources on SEM.

Juniors alone were asked to state their degree of agreement with the following statement.

- I understand what the speciality of SEM involves.

**Section 3: Medical school experience of SEM and MSK teaching**

1) How often were you exposed to SEM during medical school? (please define this as any time you were exposed to teaching that was titled as being related to either 'sport' or 'exercise/physical activity')

- None
- 1-2 times a year
- 1-2 times a month
- 1-2 times a week
- >2 times a week
- Other (then asked to specify)

**Section 4: Aspects of SEM: which are the most important to include in undergraduate education?**

1) Participants were asked to rate the importance of the following aspects for undergraduate SEM education. 1 meant least important. 2 meant most important.

- MSK injuries and conditions
- Pitchside Care
- Exercise Physiology
- Biomechanics
- Rehabilitation
- Nutrition
- Musculoskeletal Examination skills
- Sports ethics and law
- Drugs in sport
- Sports psychology
- Working as a team doctor
- SEM in specialist groups (eg disability, women, older athletes, children)
- Exercise to prevent and manage disease
- Use of Social Media

2) If you think there are other SEM aspects that are important for undergraduate education please give them below.

**Section 5: Modes of delivery for teaching SEM**

1) Participants were asked to rate the following modes of delivery for their effectiveness in teaching SEM to undergraduates. For all modes assume that the content has been created specific for undergraduate level. 1 meant worst mode. 10 meant best mode.

- Lectures
- Podcasts
- Textbook
- Online text-based resources
- Online seminars
- Other (then asked to specify)

End of survey.
